# Supplementary material for: Sulfonation of Natural Carbonaceous Bentonite as a Low-Cost Acidic Catalyst for Effective Transesterification of Used Sunflower Oil into Diesel; Statistical Modeling and Kinetic Properties
Source: PubMed Central journal article supplement — ACS Omega. 2021 Nov 13;6(46):31260–71. doi: 10.1021/acsomega.1c05021 (PMC8613855; doi:10.1021/acsomega.1c05021), 2021-11-13
Supplement: ao1c05021_si_001.pdf [file ao1c05021_si_001.pdf]

## Supporting Information

### Sulfonation of natural carbonaceous bentonite as low-cost acidic catalyst for effective transesterification of used sunflower oil into diesel; statistical modeling and kinetic properties

Walaa A. Hassan<sup>§</sup>, Ezzat A. Ahmed<sup>§</sup>, Mohamed A. Moneim<sup>§</sup>, Mohamed S. Shaban<sup>\*†</sup>, Ahmed M. El-Sherbeen<sup>§</sup>, Nahid Siddiqui<sup>‡</sup>, Jae-Jin Shim<sup>‡</sup>, Mostafa R.

Abukhadra<sup>\*†</sup>

<sup>§</sup>Geology Department, Faculty of Science, Assiut University, Egypt

<sup>\*</sup>Geology Department, Faculty of Science, New Valley University, Egypt

<sup>‡</sup>Industrial Engineering Department, College of Engineering, King Saud University, P.O. Box 800, Riyadh 11421, Saudi Arabia

<sup>‡</sup>Amity Institute of Biotechnology, Amity University, NOIDA, India

<sup>‡</sup>School of Chemical Engineering, Yeungnam University, Gyeongsan, Gyeongbuk 38541, Republic of Korea

<sup>†</sup>Geology Department, Faculty of Science, Beni-Suef University, Egypt

<sup>†</sup>Materials Technologies and their Applications Lab, Geology Department, Faculty of Science, Beni-Suef University, Egypt

Corresponding Email address\*: [Abukhadra89@Science.bsu.edu.eg](mailto:Abukhadra89@Science.bsu.edu.eg)

### Content

1. Figure S1. the petrographic studies of oil shale in thin sections using polarized transmitted microscope.....S2
2. Figure S2. SEM image of the S-CB catalyst after the transesterification reactions (Spent catalyst) .....S2
3. Figure S3. the normal probability plot for studentized residuals for the suggested experimental conditions.....S3
4. Table S1. The optimization test scheme constraints for the suggested optimizing conditions for the transesterification of SFO over S-CB catalyst.....S3
5. Table S2. the determination coefficient and the rate constant for the studied Pseudo-first order kinetic model.....S3
6. Table S3. the Fatty acid content and physical properties of the inspected spent sunflower oil.....S4
7. Table S4. the upper and lower values of the inputs in their actual and coded values.....S4

(S1)

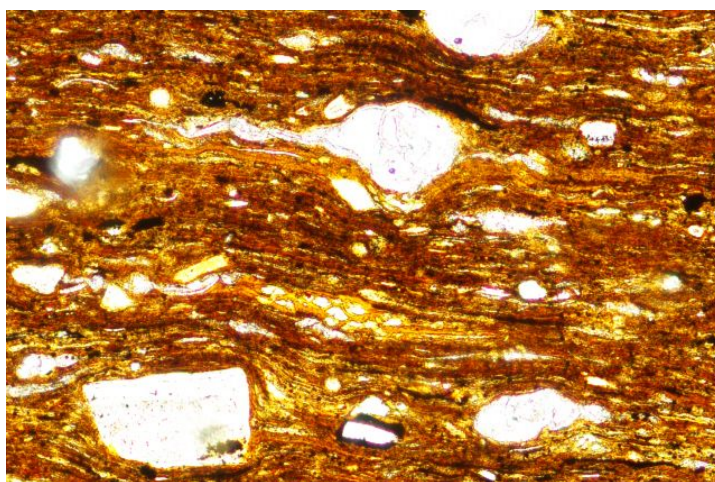

**Figure S1.** the petrographic studies of oil shale in thin sections using polarized transmitted microscope

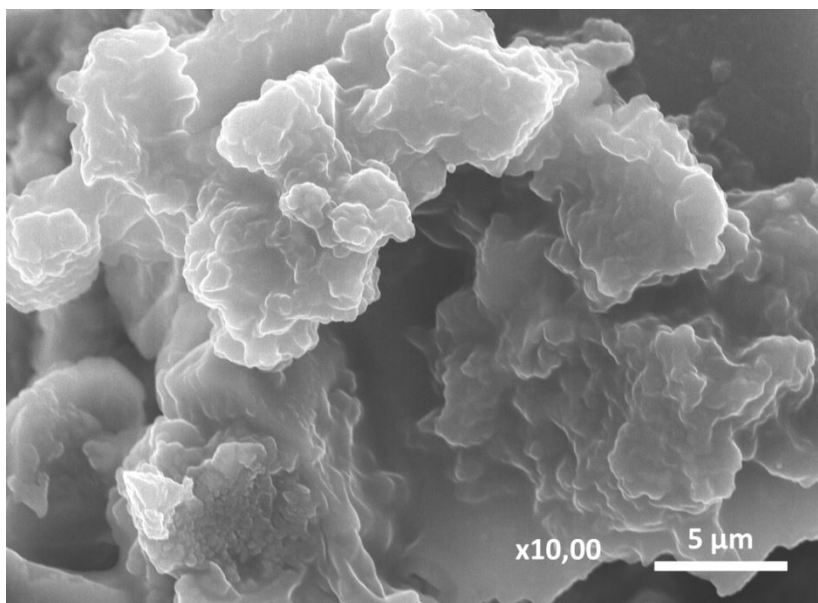

**Figure S2.** SEM image of the S-CB catalyst after the transesterification reactions (Spent catalyst)

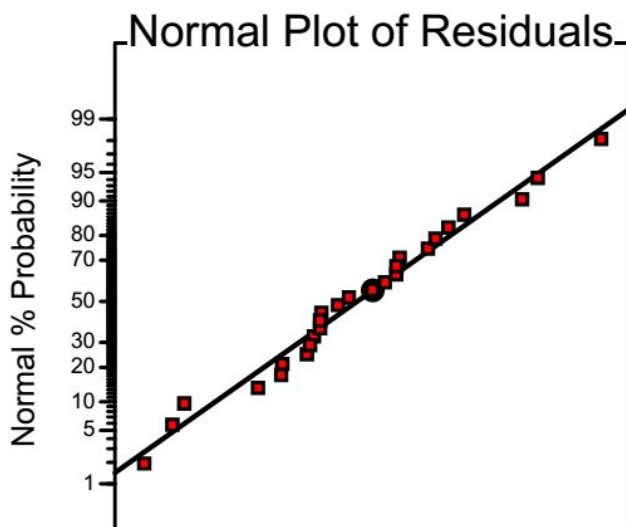

(S2)

**Figure S3.** the normal probability plot for studentized residuals for the suggested experimental conditions

**Table S1.** The optimization test scheme constraints for the suggested optimizing conditions for the transesterification of SFO over S-CB catalyst

| Optimization test scheme constraints |             |             |             |             |             |            |
|--------------------------------------|-------------|-------------|-------------|-------------|-------------|------------|
| Name                                 |             | Lower Limit | Upper Limit | Lower coded | Upper coded | Importance |
| Time                                 | Is in range | 20 min      | 150 min     | 1           | 1           | 3          |
| Temperature                          | Is in range | 25 °C       | 75 °C       | 1           | 1           | 3          |
| Methanol:oil ratio                   | Is in range | 4:1         | 15:1        | 1           | 1           | 3          |
| Catalyst loading                     | Is in range | 2 wt.,%     | 5 wt.,%     | 1           | 1           | 3          |
| Biodiesel yield                      | Maximum     |             |             |             |             |            |

**Table S2.** the determination coefficient and the rate constant for the studied Pseudo-first order kinetic model

| Temperature | Determination coefficient (R <sup>2</sup> ) | Rate constant (k) |
|-------------|---------------------------------------------|-------------------|
| 50 °C       | 0.98                                        | 0.02992           |
| 60 °C       | 0.98                                        | 0.03651           |
| 70 °C       | 0.95                                        | 0.04156           |

**Table S3.** the Fatty acid content and physical properties of the inspected spent sunflower oil

| Fatty acid composition                                                  |         |
|-------------------------------------------------------------------------|---------|
| Fatty acid composition                                                  | Percent |
| Myristic acid (C <sub>14</sub> H <sub>28</sub> O <sub>2</sub> ) (C14:0) | 11.3 %  |
| Linoleic acid(C <sub>18</sub> H <sub>32</sub> O <sub>2</sub> ) (C18:3)  | 15 %    |

(S3)

|                                                                            |                |
|----------------------------------------------------------------------------|----------------|
| <b>Palmitoleic (C<sub>16</sub>H<sub>30</sub>O<sub>2</sub>) (C16:1)</b>     | <b>33.8 %</b>  |
| <b>Oleic acid (C<sub>18</sub>H<sub>34</sub>O<sub>2</sub>) (C18:1)</b>      | <b>30.6 %</b>  |
| <b>Palmitic acid (C<sub>16</sub>H<sub>32</sub>O<sub>2</sub>) (C16:0)</b>   | <b>2.3 %</b>   |
| <b>Eicosanoic acid (C<sub>24</sub>H<sub>48</sub>O<sub>2</sub>) (C20:1)</b> | <b>2.5 %</b>   |
| <b>Stearic acid (C<sub>18</sub>H<sub>36</sub>O<sub>2</sub>) (C18:0)</b>    | <b>1.8 %</b>   |
| <b>Physical properties</b>                                                 |                |
| <b>Molecular weight</b>                                                    | 922 g/mol      |
| <b>Saponification value</b>                                                | 187 mg KOH/gm  |
| <b>Acid value</b>                                                          | 2.23 mg KOH/gm |
| <b>Kinematic viscosity</b>                                                 | 45.2 cSt       |

**Table S4.** the upper and lower values of the inputs in their actual and coded values

| Factor   | Name                      | Low    | Medium | High actual | Low   | Medium | High  |
|----------|---------------------------|--------|--------|-------------|-------|--------|-------|
|          |                           | actual | actual |             | coded | coded  | coded |
| <b>A</b> | <b>Temperature (°C)</b>   | 25     | 50     | 75          | -1    | 0      | 1     |
| <b>B</b> | <b>Time (min)</b>         | 20     | 85     | 150         | -1    | 0      | 1     |
| <b>C</b> | <b>Methanol/oil ratio</b> | 4/1    | 9.5/1  | 15/1        | -1    | 0      | 1     |
| <b>D</b> | <b>Loading (wt.,%)</b>    | 2      | 3.5    | 5           | -1    | 0      | 1     |
